# Supplementary material for: Elucidating the binding interaction of andrographolide with the plasma proteins: biophysical and computational approach
Source: Royal Society of Chemistry journal article supplement (doi:10.1039/c6ra25671f), 2017-01-01
Supplement: c6ra25671f1.pdf [file c6ra25671f1.pdf]

## **Elucidating the binding interaction of andrographolide with plasma proteins: biophysical and computational approach**

Daniel Pushparaju Yeggoni<sup>†</sup>, Christian Kuehne<sup>‡</sup>, Aparna Rachamalla<sup>¶</sup>, Rajagopal Subramanyam<sup>†\*</sup>

<sup>†</sup>Department of Plant Sciences, School of Life Sciences, University of Hyderabad, Hyderabad 500046, India

<sup>‡</sup>Institute of Laboratory Medicine, Clinical Chemistry and Pathobiochemistry, Charité-Universitätsmedizin Berlin, CVK, Augustenburger Platz 1, 13353, Berlin, Germany.

<sup>¶</sup>National Institute of Animal Biotechnology, Axis Clinicals Building, Miyapur, Hyderabad, 500049, India

\*Corresponding author

RajagopalSubramanyam

Department of Plant Sciences

School of Life Sciences

University of Hyderabad 500 046 India

Tel: +91-40-23134572

Fax: +91-40-23010120

Email: [srgsl@uohyd.ernet.in](mailto:srgsl@uohyd.ernet.in)

**Fig.SI 1.**

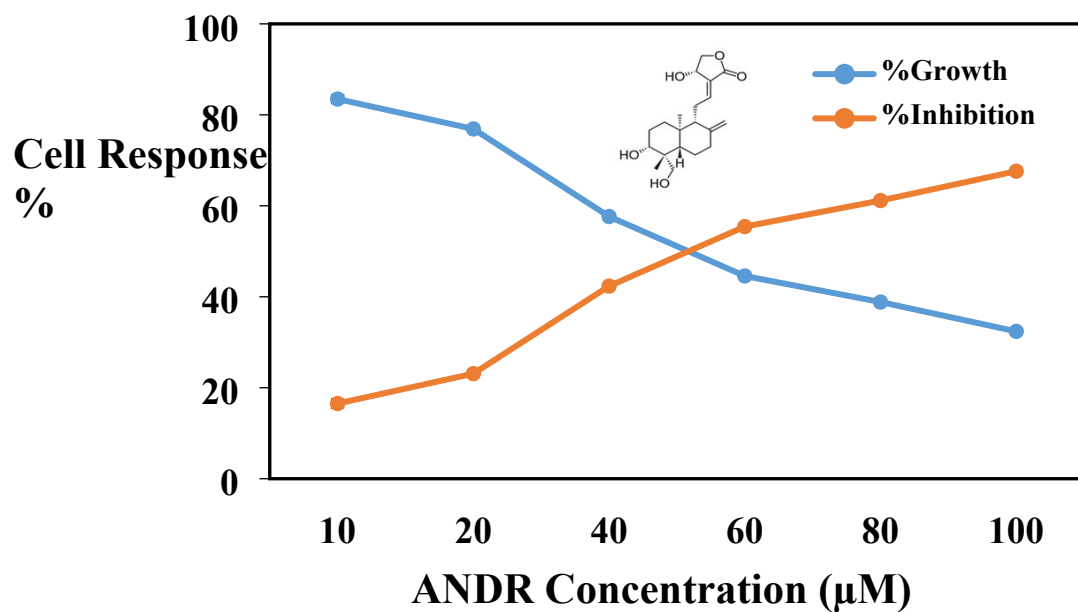

**Fig.SI 1.** Cell response of ANDR. ANDR showing anti-cancer properties (A) against breast cancer cells (MCF-7) in a dose dependent manner. Cell growth was measured by the MTT assay and the  $IC_{50}$  values were calculated accordingly.

Fig.SI 2.

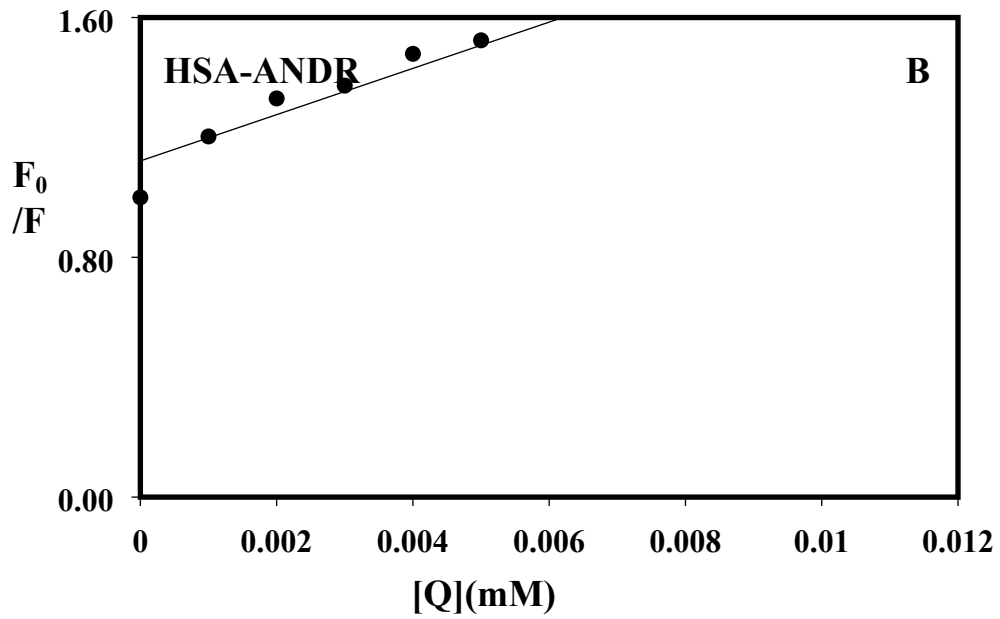

Fig.SI 2. Stern-Volmer plots of HSA-ANDR complexes showing fluorescence quenching constant ( $K_q$ ). Here the plot is showing  $F_0/F$  against  $[Q]$  for ANDR.

Fig.SI 3.

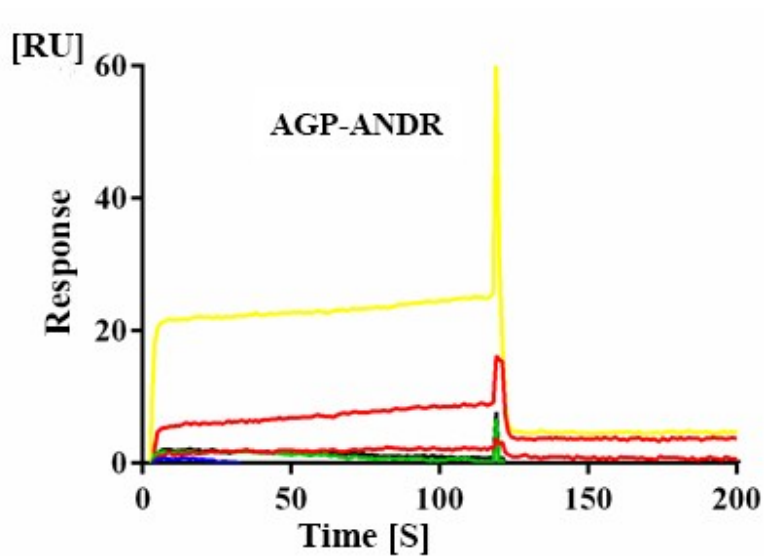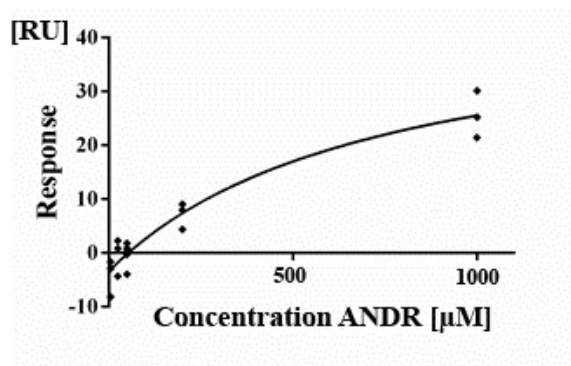

Fig.SI 3. Sensorgrams of ANDR binding to AGP immobilized on a CM 5 sensor chip (top) and respective  $R_{eq}$  values fitted to the steady state isotherm binding model (bottom). Increasing concentrations of the analyte are

denoted by different colors: 5  $\mu\text{M}$  (blue), 25  $\mu\text{M}$  (black), 50  $\mu\text{M}$  (green),  
200  $\mu\text{M}$  (red) and 1000  $\mu\text{M}$  (yellow) for ANDR-AGP.
